# Supplementary material
Source: PubMed Central journal article supplement (PMC6942224)
Supplement: NIHMS1537240-supplement-2.pdf [file NIHMS1537240-supplement-2.pdf]

## Supplemental Data

### Endothelin-1, cardiac morphology, and heart failure: The MESA Angiogenesis Study

Peter J. Leary, MD, PhD<sup>1</sup> (learyp@uw.edu); Nancy S. Jenny, PhD<sup>2†</sup> (nancy.jenny@uvm.edu); David A. Bluemke, MD, PhD<sup>3</sup> (dbluemke@rsna.org); Steven M. Kawut, MD, MS<sup>4</sup> (kawut@upenn.edu); Richard A. Kronmal, PhD<sup>5</sup> (kronmal@uw.edu); Joao A. Lima, MD<sup>6</sup> (jlina@jhmi.edu); Bradley A. Maron, MD<sup>7</sup> (bmaron@partners.org); David D. Ralph, MD<sup>1</sup> (ddralph@uw.edu); Samuel G. Rayner, MD<sup>1</sup> (srayner@uw.edu); John J. Ryan, MD<sup>8</sup> (john.ryan@hsc.utah.edu); Zachary L. Steinberg, MD<sup>1</sup> (zsteinb@uw.edu); Karen D. Hinckley Stukovsky, MS<sup>5</sup> (hincklek@uw.edu); Ryan J. Tedford, MD<sup>9</sup> (tedfordr@muscc.edu)

#### Affiliations:

<sup>1</sup> University of Washington, Department of Medicine; <sup>2</sup> University of Vermont, Department of Pathology and Laboratory Medicine, † Deceased, June 13, 2018; <sup>3</sup> University of Wisconsin, Department of Radiology; <sup>4</sup> Perelman School of Medicine at the University of Pennsylvania, Departments of Medicine and Epidemiology; <sup>5</sup> University of Washington, Department of Biostatistics; <sup>6</sup> Johns Hopkins Hospital, Departments of Medicine and Radiology; <sup>7</sup> Veterans Affairs Boston Healthcare System, Department of Cardiology; Brigham and Women's Hospital, Division of Cardiology; and Harvard Medical School; <sup>8</sup> University of Utah, Department of Medicine; <sup>9</sup> Medical University of South Carolina, Department of Medicine

Figure E1. Polynomial smoothed function of the UNADJUSTED relationship between ET1 and cardiac morphology. Only presented in the range from the 10<sup>th</sup> to 90<sup>th</sup> percentile given the limitations of performing a polynomial smoothing algorithm where variables are sparse.

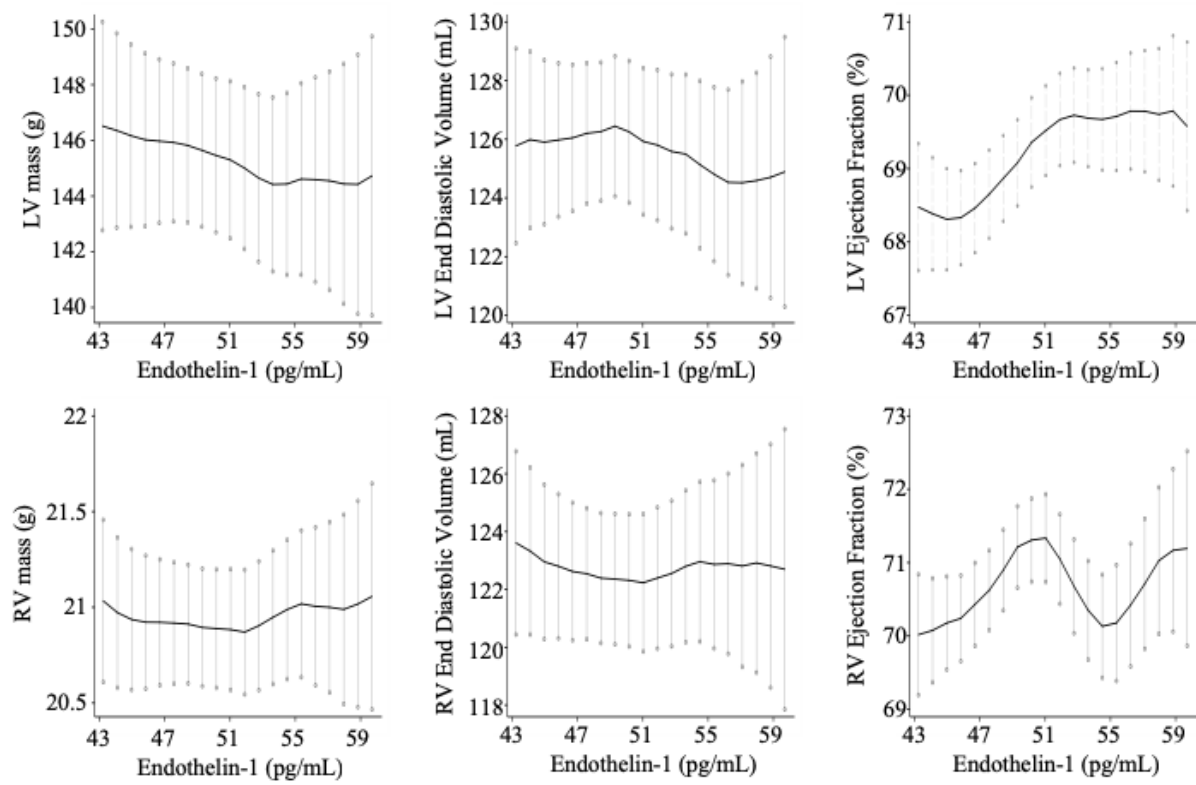

Figure E2. Predicted linear fit over the range of observed endothelin-1 values for the ADJUSTED relationship between ET1 and cardiac morphology.

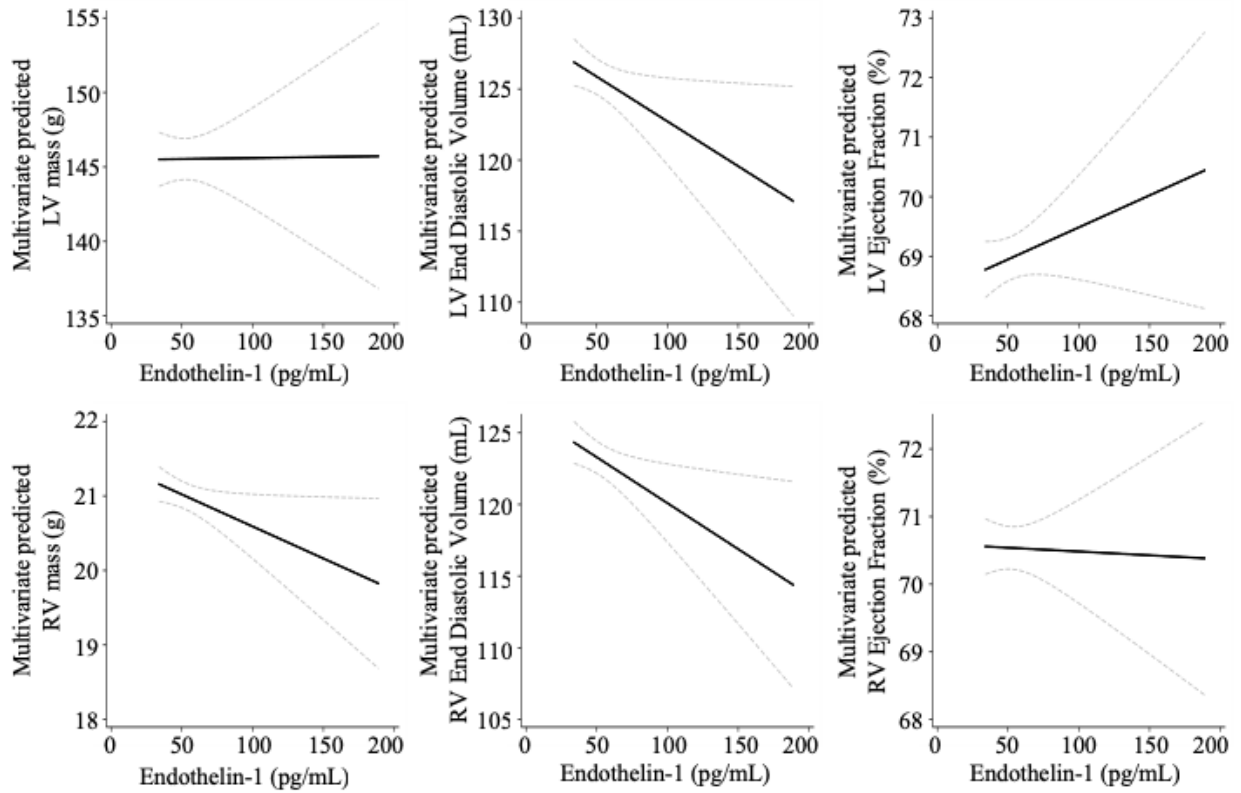

**Table E1. Characteristics of the MESA Angiogenesis Cohort (n=1,383)**

|                                      | Lowest<br>Endothelin-1 | Low-<br>Medium<br>Endothelin-1 | High-Medium<br>Endothelin-1 | Highest<br>Endothelin-1 |
|--------------------------------------|------------------------|--------------------------------|-----------------------------|-------------------------|
| Number of participants               | 184                    | 548                            | 385                         | 264                     |
| Mean Endothelin-1 (pg/mL)            | 41.7 ± 1.9             | 47.1 ± 1.7                     | 52.7 ± 1.6                  | 68.8 ± 45.0             |
| Endothelin-1 range (pg/mL)           | 34.6 – 43.8            | 44.1 – 49.9                    | 50.0 – 55.9                 | 56.0 – 189.1            |
| Age (years)                          | 63 ± 10                | 62 ± 10                        | 61 ± 10                     | 59 ± 10                 |
| Female (%)                           | 45                     | 52                             | 52                          | 58                      |
| Race (%)                             |                        |                                |                             |                         |
| White                                | 46                     | 39                             | 39                          | 41                      |
| Chinese                              | 13                     | 12                             | 14                          | 8                       |
| African-American                     | 26                     | 29                             | 25                          | 27                      |
| Hispanic                             | 15                     | 21                             | 22                          | 24                      |
| Height (cm)                          | 167 ± 9                | 166 ± 10                       | 167 ± 10                    | 166 ± 9                 |
| Weight (kg)                          | 77 ± 14                | 78 ± 17                        | 77 ± 17                     | 77 ± 14                 |
| Body mass index (kg/m <sup>2</sup> ) | 28 ± 5                 | 28 ± 5                         | 28 ± 5                      | 28 ± 5                  |
| Educational attainment (%)           |                        |                                |                             |                         |
| No high school degree                | 16                     | 15                             | 15                          | 19                      |
| High school degree                   | 17                     | 19                             | 18                          | 20                      |
| Some college                         | 15                     | 16                             | 15                          | 16                      |
| Bachelor's Degree                    | 21                     | 19                             | 14                          | 16                      |
| Higher than bachelor's degree        | 22                     | 19                             | 22                          | 17                      |
| Insurance Status (%)                 |                        |                                |                             |                         |
| No insurance                         | 4                      | 6                              | 9                           | 7                       |
| Medicare                             | 40                     | 36                             | 30                          | 26                      |
| Private insurance                    | 69                     | 73                             | 73                          | 76                      |
| Cigarette smoking status (%)         |                        |                                |                             |                         |
| Never                                | 48                     | 51                             | 53                          | 58                      |
| Former                               | 43                     | 36                             | 35                          | 34                      |
| Current                              | 9                      | 13                             | 12                          | 8                       |
| Pack-years                           | 14 ± 26                | 12 ± 24                        | 9 ± 16                      | 7 ± 16                  |
| Metabolic Syndrome (%)               | 34                     | 35                             | 33                          | 29                      |
| Hypertension (%)                     | 47                     | 43                             | 43                          | 40                      |
| Systolic blood pressure (mmHg)       | 128 ± 20               | 126 ± 22                       | 124 ± 21                    | 123 ± 21                |
| Diabetes mellitus (%)                | 15                     | 12                             | 13                          | 10                      |
| Cholesterol (mg/dL)                  | 192 ± 32               | 194 ± 34                       | 194 ± 34                    | 194 ± 32                |
| Glucose (mg/dL)                      | 99 ± 31                | 98 ± 32                        | 96 ± 30                     | 93 ± 27                 |
| NT-ProBNP (pg/mL)                    | 97 ± 170               | 94 ± 157                       | 99 ± 170                    | 87 ± 115                |
| Medications (%)                      |                        |                                |                             |                         |
| NSAIDs                               | 48                     | 44                             | 40                          | 39                      |
| Beta-blockers                        | 13                     | 9                              | 7                           | 9                       |
| ACE-inhibitors/ARBs                  | 18                     | 17                             | 17                          | 16                      |
| Any diuretic                         | 11                     | 13                             | 13                          | 9                       |

*Data presented as mean ± standard deviation or percentage as appropriate*

*Abbreviations: cm=centimeters, kg=kilograms, m<sup>2</sup>=meters squared, mmHg=millimeters of mercury, mg=milligram, dL=deciliter, pg=picogram, mL=milliliter, NT-ProBNP=amino-terminal fragment of pro-B-type natriuretic peptide NSAIDs=non-steroidal anti-inflammatory medications, ACE-inhibitors=angiotensin converting enzyme inhibitors, ARBs=angiotensin II receptor blockers*

**Table E2. Exploratory multivariable regression estimating associations between endothelin-1 level and cardiac morphology or heart failure and cardiovascular death when accounting for estimated glomerular filtration rate or co-medication use (n=1,361)**

|                                                                        | Per log increase in Endothelin-1 |               |         |
|------------------------------------------------------------------------|----------------------------------|---------------|---------|
|                                                                        | Difference                       | (95% CI)      | p-value |
| <u>Right Ventricle</u>                                                 |                                  |               |         |
| RV mass, g (Full Model <sup>†</sup> + estimated GFR)                   | -0.8                             | (-2.0, 0.3)   | 0.16    |
| RV mass, g (Full Model <sup>†</sup> + Co-medication use <sup>‡</sup> ) | -0.8                             | (-2.0, 0.3)   | 0.16    |
| RV mass, g (Full Model <sup>†</sup> + intentional exercise)            | -0.8                             | (-2.0, 0.3)   | 0.16    |
| RVEDV, mL (Full Model + estimated GFR)                                 | -7.1                             | (-14.3, 0.1)  | 0.05    |
| RVEDV, mL (Full Model + Co-medication use)                             | -6.5                             | (-13.8, 0.8)  | 0.08    |
| RVEDV, mL (Full Model + intentional exercise)                          | -7.0                             | (-14.2, 0.2)  | 0.06    |
| RVEF, % (Full Model + estimated GFR)                                   | 0.2                              | (-1.9, 2.3)   | 0.86    |
| RVEF, % (Full Model + Co-medication use)                               | 0.2                              | (-1.9, 2.4)   | 0.83    |
| RVEF, % (Full Model + intentional exercise)                            | 0.1                              | (-2.0, 2.2)   | 0.90    |
| <u>Left Ventricle</u>                                                  |                                  |               |         |
| LV mass, g (Full Model <sup>†</sup> + estimated GFR)                   | -2.1                             | (-11.2, 6.9)  | 0.65    |
| LV mass, g (Full Model <sup>†</sup> + Co-medication use <sup>‡</sup> ) | -1.3                             | (-10.5, 8.0)  | 0.79    |
| LV mass, g (Full Model <sup>†</sup> + intentional exercise)            | -2.4                             | (-11.5, 6.6)  | 0.60    |
| LVEDV, mL (Full Model + estimated GFR)                                 | -8.9                             | (-17.1, -0.7) | 0.03    |
| LVEDV, mL (Full Model + Co-medication use)                             | -8.1                             | (-16.4, 0.3)  | 0.06    |
| LVEDV, mL (Full Model + intentional exercise)                          | -9.2                             | (-17.4, -0.9) | 0.03    |
| LVEF, % (Full Model + estimated GFR)                                   | 2.8                              | (0.4, 5.2)    | 0.02    |
| LVEF, % (Full Model + Co-medication use)                               | 2.9                              | (0.5, 5.3)    | 0.02    |
| LVEF, % (Full Model + intentional exercise)                            | 2.9                              | (0.5, 5.2)    | 0.02    |

*Abbreviations: SD=standard deviation, CI=confidence interval, RV=right ventricular, GFR=glomerular filtration rate, EDV=end-diastolic volume, and EF=ejection fraction, LV=left ventricular, g=grams, mL=milliliters*

*\*Limited model: age, sex, race/ethnicity, height and weight, study site*

*<sup>†</sup>Full model: Limited + education, smoking status, pack-years, hypertension, systolic blood pressure, diabetes, and cholesterol*

*<sup>‡</sup>Co-Medication use included: ace-inhibitor use (± diuretic), angiotensin-II-receptor blocker use (± diuretic), beta-blocker use (± diuretic), digoxin use, oral steroid use, non-steroidal anti-inflammatory use (including aspirin, COX-2 inhibitors and other non-steroidal anti-inflammatory medications) and leukotriene antagonist use*

**Table E3. Multivariable linear regression estimating associations between endothelin-1 level and cardiac structure and function including influential outliers (n=1,364)**

|                             | Per log increase in Endothelin-1 |               |         |
|-----------------------------|----------------------------------|---------------|---------|
|                             | Difference                       | (95% CI)      | p-value |
| <u>Right Ventricle</u>      |                                  |               |         |
| RV mass, g (Unadjusted)     | 0.1                              | (-1.2, 1.4)   | 0.88    |
| RV mass, g (Limited model*) | -0.9                             | (-1.9, 0.0)   | 0.06    |
| RV mass, g (Full Model†)    | -1.0                             | (-1.9, 0.0)   | 0.05    |
| RVEDV, mL (Unadjusted)      | -0.1                             | (-8.9, 8.7)   | 0.98    |
| RVEDV, mL (Limited model)   | -6.9                             | (-12.8, -0.9) | 0.02    |
| RVEDV, mL (Full Model)      | -8.0                             | (-14.0, -2.0) | 0.009   |
| RVEF, % (Unadjusted)        | -0.3                             | (-2.2, 1.6)   | 0.74    |
| RVEF, % (Limited model)     | -0.1                             | (-1.8, 1.7)   | 0.96    |
| RVEF, % (Full Model)        | -0.1                             | (-1.9, 1.6)   | 0.87    |
| <u>Left Ventricle</u>       |                                  |               |         |
| LV mass, g (Unadjusted)     | -0.1                             | (-11.3, 11.4) | 0.99    |
| LV mass, g (Limited model*) | -3.7                             | (-11.6, 4.2)  | 0.36    |
| LV mass, g (Full Model†)    | -1.8                             | (-9.3, 5.7)   | 0.64    |
| LVEDV, mL (Unadjusted)      | -1.6                             | (-10.6, 7.3)  | 0.72    |
| LVEDV, mL (Limited model)   | -8.2                             | (-15.0, -1.4) | 0.02    |
| LVEDV, mL (Full Model)      | -8.8                             | (-15.6, -2.0) | 0.01    |
| LVEF, % (Unadjusted)        | 1.9                              | (-0.3, 4.0)   | 0.08    |
| LVEF, % (Limited model)     | 2.2                              | (0.3, 4.2)    | 0.03    |
| LVEF, % (Full Model)        | 2.1                              | (0.2, 4.1)    | 0.03    |

*Abbreviations: SD=standard deviation, CI=confidence interval, RV=right ventricular, GFR=glomerular filtration rate, EDV=end-diastolic volume, and EF=ejection fraction, LV=left ventricular, g=grams, mL=milliliters*

*\*Limited model: age, sex, race/ethnicity, height and weight, study site*

*†Full model: Limited + education, smoking status, pack-years, hypertension, systolic blood pressure, diabetes, and cholesterol*

**Table E4. Cox proportional hazard regression estimating the relationship of log of endothelin-1 level at the baseline exam with clinical outcomes including influential endothelin-1 outliers (n=1,364)**

|                                                        | Hazard Ratio per log increase in endothelin-1 level | (95% CI)     | p-value |
|--------------------------------------------------------|-----------------------------------------------------|--------------|---------|
| Hazard of heart failure <u>or</u> cardiovascular death |                                                     |              |         |
| Unadjusted                                             | 0.02                                                | (0.00, 0.49) | 0.02    |
| Limited model*                                         | 0.08                                                | (0.01, 1.06) | 0.06    |
| Full Model†                                            | 0.09                                                | (0.00, 1.42) | 0.09    |
| Hazard of heart failure                                |                                                     |              |         |
| Unadjusted                                             | 0.04                                                | (0.00, 1.17) | 0.06    |
| Limited model*                                         | 0.11                                                | (0.01, 1.75) | 0.12    |
| Full Model†                                            | 0.14                                                | (0.01, 2.73) | 0.20    |
| Hazard cardiovascular death                            |                                                     |              |         |
| Unadjusted                                             | 0.03                                                | (0.00, 2.07) | 0.10    |
| Limited model*                                         | 0.09                                                | (0.00, 2.73) | 0.17    |
| Full Model†                                            | 0.09                                                | (0.00, 2.98) | 0.18    |
| Hazard of non-cardiovascular death                     |                                                     |              |         |
| Unadjusted                                             | 0.36                                                | (0.03, 5.23) | 0.46    |
| Limited model*                                         | 0.51                                                | (0.13, 2.01) | 0.34    |
| Full Model†                                            | 0.57                                                | (0.14, 2.42) | 0.45    |

*Definition of abbreviations: CI-confidence interval*

*Because initial models suggested a non-proportional hazard, all models accounted included a term accounting for the possibility of a time-varying relationship between endothelin-1 and the hazard of heart failure or death. Three influential endothelin-1 outliers were excluded from the primary analysis. Inclusion of these outlier strengthened the association with mortality*

*\*Limited model: age, sex, race/ethnicity, height and weight, study site*

*†Full model: Limited + education, smoking status, pack-years, hypertension, systolic blood pressure, diabetes, and cholesterol*

**Table E5. Parsimonious models using backward elimination (threshold for significance,  $p=0.05$ ) for all adjusted regression analyses**

|                                                                                                                                          | Hazard Ratio | (95% CI)     | p-value |
|------------------------------------------------------------------------------------------------------------------------------------------|--------------|--------------|---------|
| Hazard of heart failure or cardiovascular death                                                                                          |              |              |         |
| Parsimonious Model<br>(included age, weight, site, and smoking status)                                                                   | 0.08         | (0.00, 1.37) | 0.08    |
| Hazard of heart failure                                                                                                                  |              |              |         |
| Parsimonious Model<br>(included age, weight, and site)                                                                                   | 0.11         | (0.01, 2.18) | 0.15    |
| Hazard cardiovascular death                                                                                                              |              |              |         |
| Parsimonious Model<br>(included age, pack-years, and diabetes)                                                                           | 0.08         | (0.00, 3.92) | 0.20    |
| Hazard of non-cardiovascular death                                                                                                       |              |              |         |
| Parsimonious Model<br>(included age, smoking status, pack-years, and cholesterol)                                                        | 0.75         | (0.08, 7.03) | 0.80    |
|                                                                                                                                          | Difference   | (95% CI)     | p-value |
| RV mass                                                                                                                                  |              |              |         |
| Parsimonious Model<br>(included age, gender, height, weight, study site, and systolic blood pressure)                                    | -0.7         | (-1.8, 0.4)  | 0.23    |
| RV End Diastolic Volume                                                                                                                  |              |              |         |
| Parsimonious Model<br>(included age, gender, height, weight, study site, and pack-years)                                                 | -6.4         | (-13.6, 0.8) | 0.08    |
| RV Ejection Fraction                                                                                                                     |              |              |         |
| Parsimonious Model<br>(included age, gender, weight, study site, systolic blood pressure, and cholesterol)                               | 0.2          | (-1.9, 2.3)  | 0.85    |
| LV Mass                                                                                                                                  |              |              |         |
| Parsimonious Model<br>(included age, gender, race, height, weight, study site, smoking status, hypertension and systolic blood pressure) | -1.9         | (-10.9, 7.1) | 0.68    |
| LV End Diastolic Volume                                                                                                                  |              |              |         |
| Parsimonious Model<br>(included age, gender, race, height, weight, study site, and systolic blood pressure)                              | -7.8         | (-16.0, 0.3) | 0.06    |
| LV Ejection Fraction                                                                                                                     |              |              |         |
| Parsimonious Model<br>(included age, gender, race, and study site)                                                                       | 2.8          | (0.5, 5.2)   | 0.02    |
